# Supplementary material for: Enabling artificial photosynthesis systems with molecular recycling: A review of photo- and electrochemical methods for regenerating organic sacrificial electron donors
Source: Beilstein J Org Chem. 2023 Aug 8;19:1198–215. doi: 10.3762/bjoc.19.88 (PMC10428615; doi:10.3762/bjoc.19.88)
Supplement: File 1 — A spreadsheet containing the tables with the oxidation potential data for the electron donors and redox active compounds discussed in this review. The table contains DOI numbers for the references where the potentials were reported. [file Beilstein_J_Org_Chem-19-1198-s001.xlsx]

## Sheet: Supporting Information
	Supporting Information File 1
	This supporting information contains tables of oxidation potentials reported for a series of sacrificial electron donors and other compounds that were compiled into a set of plots for the review. The DOI numbers and links are in the the column measurement_ref. Each compound has a unique reference called compound_id. Some numbers are missing because I couldn't find potentials for all the compounds…
Table S1	Table of oxidation potentials measured in aqueous media
Table S2	Table of oxidation potentials measured for non-aqueous media

## Sheet: Table S1 aqueous
Column1	compound_id	name	formula	type	label	compound_family	redox_potential_V	reference_electrode	electrolyte	solvent	pH	measurement_ref
0	1	triethylamine	(C2H5)3N	electron donor	sacrificial donor	amine	0.69	SCE		water		https://doi.org/10.1016/j.crci.2015.11.026
1	2	triethanolamine	(HOCH2CH2)3N	electron donor	sacrificial donor	amine	1.312	SCE	pH7 phosphate buffer	water	7	https://doi.org/10.1039/c3cp55023k
2	9	ethylenediaminetetraacetic acid (EDTA)	(HO2CCH2)2NCH2CH2N(CH2CO2H)2	electron donor	sacrificial donor	amine	1.412	SCE	pH7 phosphate buffer	water	7	https://doi.org/10.1039/c3cp55023k
3	10	dihydronicotinamide adenine dinucleotide (NADH)	C21H29N7O14P2	electron donor	recyclable donor	R-NADH	0.902	SCE		water	7	https://doi.org/10.1016/0302-4598(74)85011-7
9	15	(ferrocenylmethyl)trimethylammonium chloride (FcNCl)	C14H20ClFeN	electron donor	RFB redox couple	ferrocene	0.852	SCE	NaCl	water	7	DOI:10.1021/jacs.6b10984
10	16	N1-ferrocenylmethyl-N1,N1,N2,N2,N2-pentamethylpropane-1,2-diaminium dibromide (FcN2Br2)	C19H32Br2FeN2	electron donor	RFB redox couple	ferrocene	0.852	SCE	NaCl	water	7	DOI:10.1021/jacs.6b10984
12	18	(dimethylaminomethyl)ferrocene (FcN)	C13H17FeN	electron donor	RFB redox couple	ferrocene	0.642	SCE	NaCl	water	7	DOI:10.1021/jacs.6b10984
15	22	2,7-anthraquinonedisulfonic acid (AQDS)	C14H8O8S2	electron donor	hydrogen carrier	hydroquinone	0.456	SCE		water	0	DOI:10.1002/aenm.202002453
16	23	potassium 2,5-hydroxybenzenesulfonate (potassium hydroquinone sulfonate)	C6H5KO5S	electron donor	hydrogen carrier	hydroquinone	0.892	SCE		water	0.7	DOI:10.1002/aenm.202002453
17	24	methylviologen dichloride (MVCl2)	C12H14N2.2Cl	electron acceptor	RFB redox couple	viologen	-0.585	SCE	NaCl	water		http://dx.doi.org/10.1002/anie.201606472
18	25	N,N’-dicarbamido-4,4’-bipyridinium dichloride	C14H16N4O2.2Cl	electron acceptor	RFB redox couple	viologen	-0.415	SCE	NaCl	water		http://dx.doi.org/10.1002/anie.201606472
19	26	N,N’-bis(carboxyethyl)-4,4’-bipyridinium dichloride	C16H18N2O4.2Cl	electron acceptor	RFB redox couple	viologen	-0.485	SCE	NaCl	water		http://dx.doi.org/10.1002/anie.201606472
20	27	N,N,N,2,2,6,6-heptamethylpiperidinyloxy-4-ammonium chloride (TEMPTMA)	C12H25N2O.Cl	electron donor	RFB redox couple	TEMPO	0.835	SCE	NaCl	water		http://dx.doi.org/10.1002/anie.201606472
21	28	TEMPOL	C9H18NO2	electron donor	RFB redox couple	TEMPO	0.685	SCE	NaCl	water		http://dx.doi.org/10.1002/anie.201606472
28	34	2,3-dichloro-5,6-dicyano-1,4-benzoquinone (DDQ)	C8Cl2N2O2	electron donor	hydrogen carrier	hydroquinone	1.168	SCE	p-TsOH	water		DOI: 10.1021/jacs.6b05797
63	51	1-benzyl-1,4-dihydronicotinamide (BNAH)	C13H14N2O	electron donor	recyclable donor	R-NADH	1.317	SCE	unspecified buffer	aqueous	7	DOI: 10.1016/0302-4598(74)85011-7
71	57	1-methyl-4-benzoylpyridinium	C13H12NO	electron acceptor	RFB redox couple	pyridinium	-0.805	SCE	NaCl	aqueous	7	DOI: 10.1021/acs.jpcc.7b06247

## Sheet: Table S2 non aqueous
Column1	compound_id	name	formula	type	label	compound_family	redox_potential_V	reference_electrode	electrolyte	solvent	measurement_ref
4	5	1,3-dimethyl-2-phenylbenzimidazoline (BIH)	C15H16N2	electron donor	sacrificial donor	benzimidazole	0.02	Fc/Fc+	Et4NClO4	acetonitrile	doi:10.1016/j.tet.2006.03.061
5	11	2-(4-methoxyphenyl)-1,3-dimethyl-2H-benzimidazole (ADMBI)	C16H18N2O	electron donor	sacrificial donor	benzimidazole	-0.03	Fc/Fc+	Et4NClO4	acetonitrile	doi:10.1016/j.tet.2006.03.061
6	12	1,3-dimethyl-2-(4-methylphenyl)-2H-benzimidazole (DMTBI)	C16H18N2	electron donor	sacrificial donor	benzimidazole	-0.02	Fc/Fc+	Et4NClO4	acetonitrile	doi:10.1016/j.tet.2006.03.061
7	13	2-(3,5-dichlorophenyl)-1,3-dimethyl-2H-benzimidazole (DCDMBI)	C15H14Cl2N2	electron donor	sacrificial donor	benzimidazole	0.09	Fc/Fc+	Et4NClO4	acetonitrile	doi:10.1016/j.tet.2006.03.061
8	14	2-(1,3-dimethyl-2H-benzimidazol-2-yl)phenol (HDMBI)	C15H16N2O	electron donor	sacrificial donor	benzimidazole	-0.01	Fc/Fc+	Et4NClO4	acetonitrile	doi:10.1016/j.tet.2006.03.061
13	20	5-methoxy-1,3-dimethyl-2-(4-methoxyphenyl)-2H-benzimidazole (BI1H)	C17H20N2O2	electron donor	sacrificial donor	benzimidazole	0.312	Fc/Fc+	TBAPF6	THF	DOI:10.1039/D1CY01209F
14	21	5,6-dimethoxy-1,3-dimethyl-2-(phenyl)-2H-benzimidazole (BI2H)	C17H20N2O2	electron donor	sacrificial donor	benzimidazole	0.062	Fc/Fc+	TBAPF6	THF	DOI:10.1039/D1CY01209F
22	29	1,4-dimethoxy-2,5-dimethylbenzene	C10H14O2	electron donor	RFB redox couple	dialkoxybenzene	0.52	Fc/Fc+	LiTFSI	EC/PC/EMC	DOI: 10.1038/srep32102
23	30	1,4-dimethoxy-2,3-dimethylbenzene	C10H14O2	electron donor	RFB redox couple	dialkoxybenzene	0.58	Fc/Fc+	LiTFSI	EC/PC/EMC	DOI: 10.1038/srep32102
24	31	2,3-dimethylquinoxaline	C10H10N2	electron acceptor	RFB redox couple	dialkylquinoxaline	-0.87	Fc/Fc+	LiBF4	PC	DOI: 10.1002/aenm.201200322
25	31	2,3-dimethylquinoxaline	C10H10N2	electron acceptor	RFB redox couple	dialkylquinoxaline	-0.55	Fc/Fc+	LiBF4	PC	DOI: 10.1002/aenm.201200322
26	32	2,5-di-tert-butyl-1,4-bis(2-methoxyethoxy)benzene (DBBB)	C20H34O4	electron donor	RFB redox couple	dialkoxybenzene	0.53	Fc/Fc+	LiPF6	EC/EMC	DOI: 10.1002/aenm.201200322
27	32	2,5-di-tert-butyl-1,4-bis(2-methoxyethoxy)benzene (DBBB)	C20H34O4	electron donor	RFB redox couple	dialkoxybenzene	0.62	Fc/Fc+	LiBF4	PEC	DOI: 10.1002/aenm.201200322
29	34	2,3-dichloro-5,6-dicyano-1,4-benzoquinone (DDQ)	C8Cl2N2O2	electron donor	hydrogen carrier	quinone	0.137	Fc/Fc+	TBAPF6	MeCN	DOI: 10.1021/jacs.6b05797
30	35	p-dimethylaminobenzaldehyde	C9H11NO	electron donor	other source	amine	0.79	Fc/Fc+	TBAClO4	MeCN	https://doi.org/10.1016/S0022-0728(70)80304-7
31	4	4-dimethylaminotoluene (DMT)	CH3C6H4N(CH3)2	electron donor	sacrificial donor	amine	0.39	Fc/Fc+	TBAClO4	MeCN	https://doi.org/10.1016/S0022-0728(70)80304-7
43	39	1,2-dimethyl-3-propyl-imidazol L-cysteine ([DMPI]2Cys) (DMPIC)	2[C8H15N2]+[C3H5NO2S]2-	electron donor	DSSC redox couple	disulfide forming	0.385	Fc/Fc+	LiClO4	acetonitrile	10.1039/C1EE02540F
44	40	9-ethyldodecahydro-1H-carbazole (H12-NEC)	C14H25N	electron donor	hydrogen carrier	amine	0.57	Fc/Fc+	NaClO4	acetonitrile	oai:duepublico.uni-duisburg-essen.de:44740
45	33	5-mercapto-1-methyltetrazole (T-)	C2H3N4S	electron donor	DSSC redox couple	disulfide forming	0.417	Fc/Fc+	TBAClO4	DMF	DOI: 10.1038/nchem.610
50	5	1,3-dimethyl-2-phenylbenzimidazoline (BIH)	C15H16N2	electron donor	sacrificial donor	benzimidazole	-0.44	Fc/Fc+		DMSO	DOI: 10.1039/C9CC00928K
51	42	1,3-dimethyl-2-(N,N-dimethylaniline)benzimidazoline	C17H21N3	electron donor	recyclable donor	benzimidazole	-0.47	Fc/Fc+		DMSO	DOI: 10.1039/C9CC00928K
52	43	9,10-dihydro-10-methyl-9-phenylacridine	C20H17N	electron donor	recyclable donor	acridine	0.28	Fc/Fc+		DMSO	DOI: 10.1039/C9CC00928K
53	19	1,3-dimethyl-2-(2,4,6-trimethoxyphenyl)-2H-benzimidazole (BIM)	C18H22N2O3	electron donor	recyclable donor	benzimidazole	-0.068	Fc/Fc+	TBAClO4	DMSO	DOI: 10.1021/acs.jpcc.2c03541
57	45	2-mercapto-5-methyl-1,3,4-thiadiazole (McMT)	C3H4N2S2	electron donor	DSSC redox couple	disulfide forming	-0.475	Fc/Fc+	LiClO4	MeCN	DOI: 10.1002/anie.201003740
58	46	tetramethylthiourea (TMTU)	C5H12N2S	electron donor	DSSC redox couple	disulfide forming	-0.007	Fc/Fc+	TEAClO4	MeCN	DOI: 10.1002/adfm.201000150
59	47	dimethyldithiocarbamate (M-)	C3H6NS2-	electron donor	DSSC redox couple	disulfide forming	0.1	Ag|AgCl	LiClO4	gamma-butyrolactone	DOI: 10.1039/c2ta00719c
60	48	diethyldithiocarbamic acid (DtcH)	C5H11NS2	electron donor	sacrificial donor	disulfide forming	-0.26	Fc/Fc+		acetonitrile	DOI: 10.1016/j.crci.2015.11.026
61	49	ethylxanthate (Xa-)	[C3H5OS2]-	electron donor	sacrificial donor	disulfide forming	-0.1	Fc/Fc+		acetonitrile	DOI: 10.1016/j.crci.2015.11.026
62	50	4-methoxyphenylthioate	[C8H7OS2]-	electron donor	sacrificial donor	disulfide forming	-0.12	Fc/Fc+		acetonitrile	DOI: 10.1016/j.crci.2015.11.026
64	52	tetrakis(dimethylamino)ethylene (TDAE)	C10H24N4	electron donor	sacrificial donor	amine	-1.09	Fc/Fc+	unspecified	acetonitrile	DOI: 10.1039/d0pp00127a
65	53	1,1,2,2-tetrapiperidinoethene (TPiE)	C22H40N4	electron donor	other source	amine	-1.06	Fc/Fc+	TBAPF6	DMF	DOI: 10.1021/jacs.1c10932
66	54	4-(1,2,2-trimorpholin-4-ylethene)morpholine (TME)	C18H32N4O4	electron donor	other source	amine	-0.85	Fc/Fc+	TBAPF6	DMF	DOI: 10.1021/jacs.1c10932
67	55	tetrakis(N-pyrrolidinyl)ethylene (TPyE)	C18H32N4	electron donor	other source	amine	-1.32	Fc/Fc+	TBAPF6	DMF	DOI: 10.1021/jacs.1c10932
68	56	1-[1,2,2-tris(azepan-1-yl)ethenyl]azepane (TAzE)	C26H48N4	electron donor	other source	amine	-1.09	Fc/Fc+	TBAPF6	DMF	DOI: 10.1021/jacs.1c10932
69	24	methylviologen dichloride (MVCl2)	C12H14N2.2Cl	electron acceptor	RFB redox couple	viologen	-0.79	Fc/Fc+	LiTFSI	acetonitrile	DOI: 10.1016/j.jechem.2018.02.014
70	24	methylviologen dichloride (MVCl2)	C12H14N2.2Cl	electron acceptor	RFB redox couple	viologen	-1.2	Fc/Fc+	LiTFSI	acetonitrile	DOI: 10.1016/j.jechem.2018.02.014
